# Supplementary material for: Development and validation of a RNA binding protein-associated prognostic model for head and neck squamous cell carcinoma
Source: publisher site journal article supplement (doi:10.18632/aging.202848), 2021-03-24
Supplement: Supplementary file [file aging-v13i6-202848-supplementary-material-SD1.pdf]

## SUPPLEMENTARY FIGURES

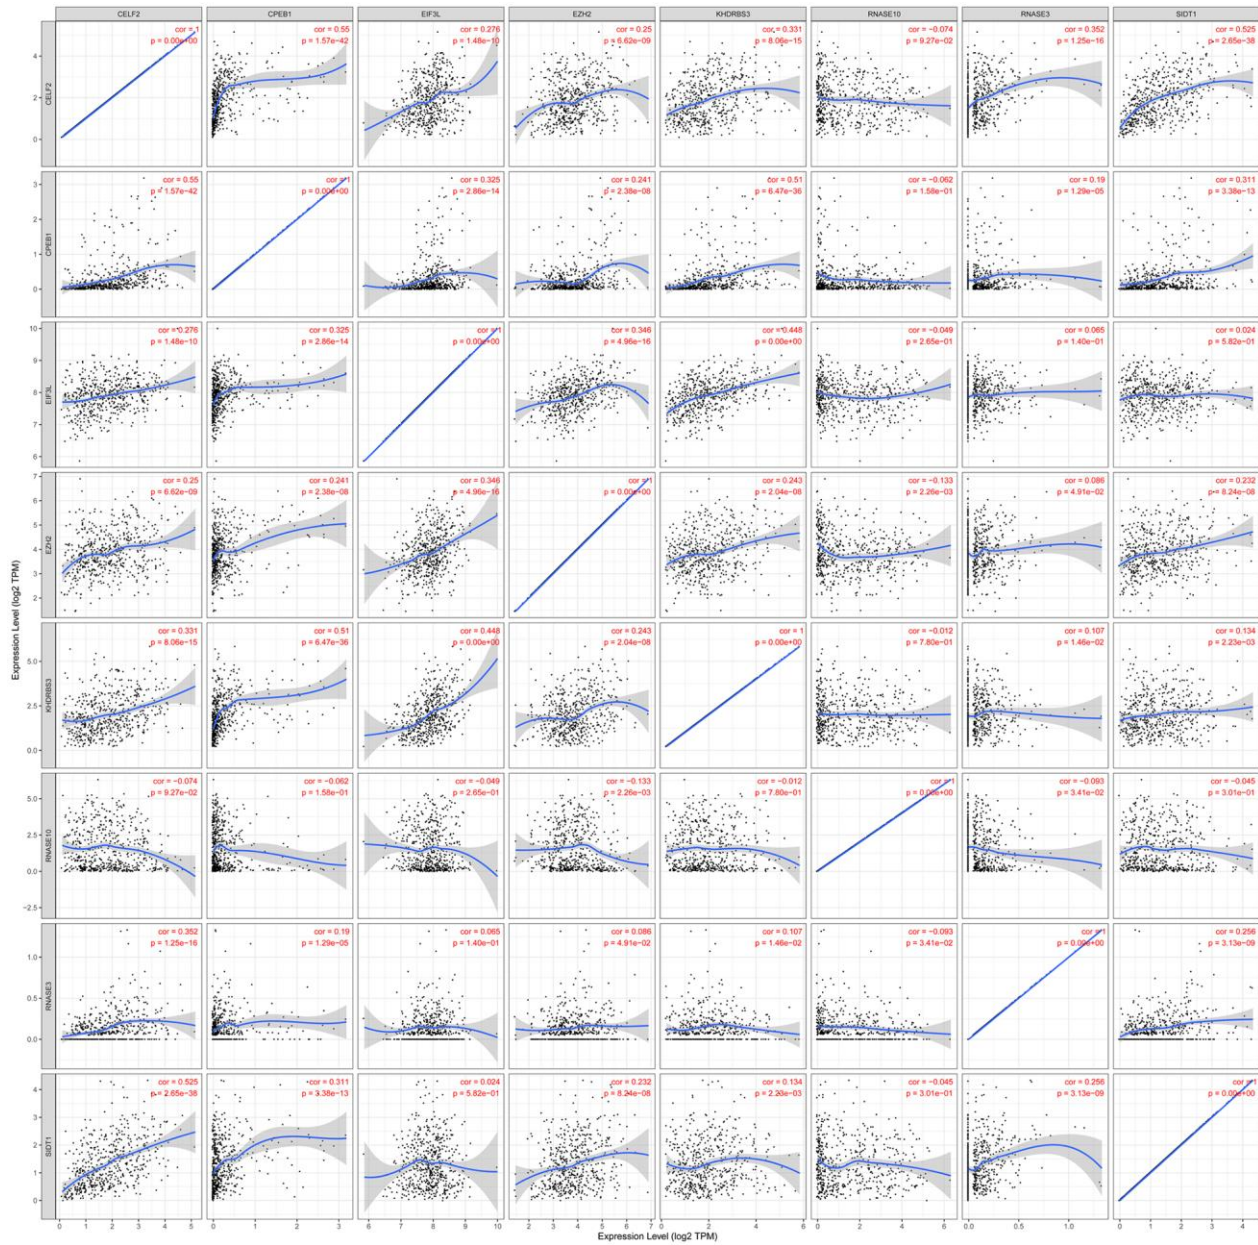

**Supplementary Figure 1. The relationship between the expression of RBPs in prognostic model.** Cor: Correlation coefficient. The value range of correlation coefficient is (- 1, 0) or (0, 1). When the value range is (- 1, 0), it means negative correlation, when the value range is (0, 1), it means positive correlation.

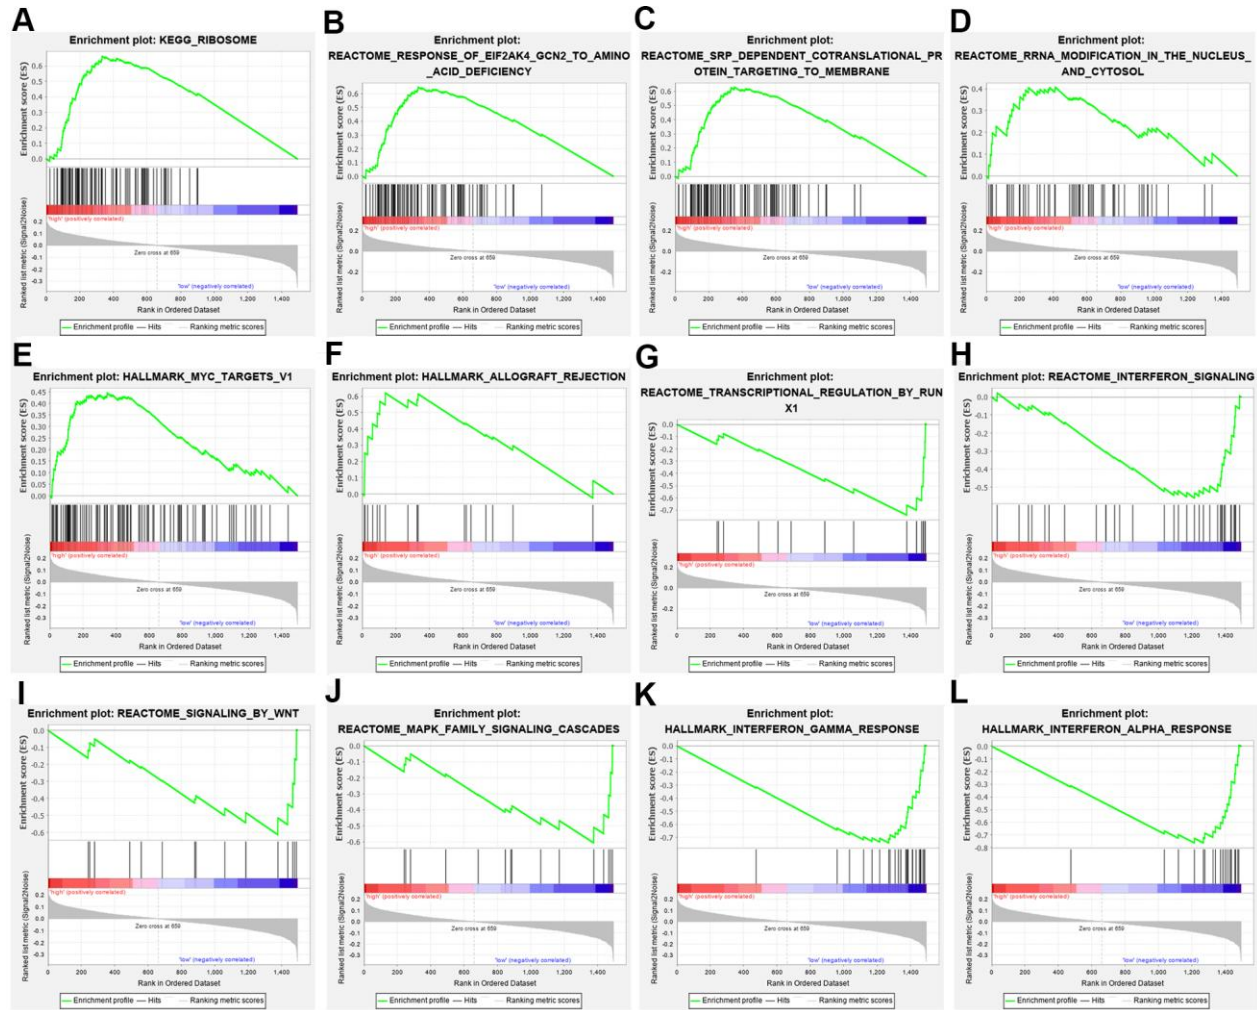

Supplementary Figure 2. Gene set enrichment analysis (GSEA) of curated genesets and hallmark genesets in high-risk and low-risk patients with HNSCC. (A–F) GSEA results in high-risk group, (G–L) GSEA results in low-risk group.

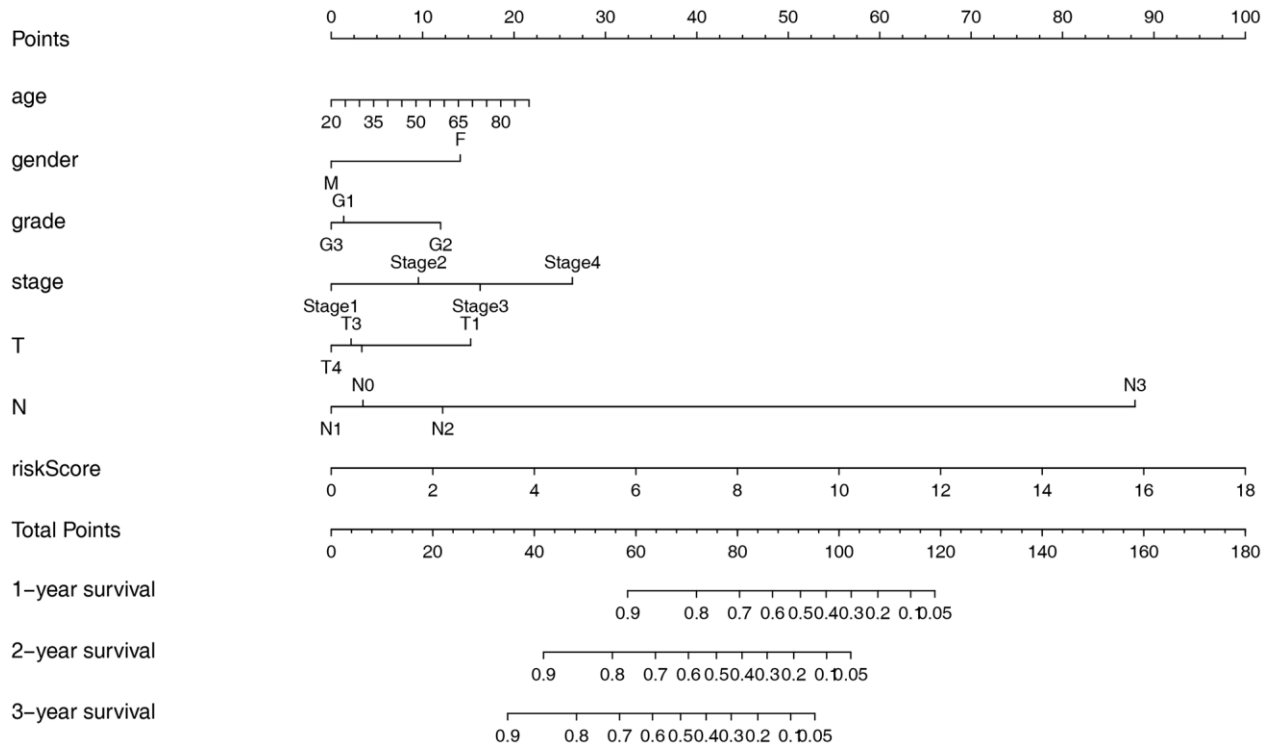

**Supplementary Figure 3. Nomogram for predicting 1-, 3-, and 5-year OS of HNSCC patients.**
