# Supplementary material for: Development and validation of a RNA binding protein-associated prognostic model for head and neck squamous cell carcinoma
Source: Aging (Albany NY). 2021 Mar 24;13(6):7975–97. doi: 10.18632/aging.202848 (PMC8034976; doi:10.18632/aging.202848)
Supplement: Supplementary Table 1 [file aging-13-202848-s002.xls]

## Sheet: Sheet1
Supplementary Table 1. The results of GO and KEGG analysis in 3 modules.
	ID	Description	Node	FDR	Gene
Module 1	GO:0051607	defense response to virus	15	6.3e-27	ADAR,DDX58,DDX60,DHX58,EIF2AK2,IFIH1,IFIT1,IFIT2,IFIT3,ISG20,OAS1,OAS2,OAS3,OASL,TLR3
	GO:0045087	innate immune response	15	3.69e-19	ADAR,DDX58,DDX60,DHX58,EIF2AK2,IFIH1,IFIT1,IFIT2,IFIT3,ISG20,OAS1,OAS2,OAS3,OASL,TLR3
	GO:0060337	type I interferon signaling pathway	9	7.97e-17	ADAR,IFIT1,IFIT2,IFIT3,ISG20,OAS1,OAS2,OAS3,OASL
	GO:0045071	negative regulation of viral genome replication	7	7.86e-13	ADAR,EIF2AK2,IFIT1,ISG20,OAS1,OAS3,OASL
	GO:0043900	regulation of multi-organism process	10	2.16e-12	ADAR,DDX58,DDX60,DHX58,EIF2AK2,IFIT1,ISG20,OAS1,OAS3,OASL
	GO:0003725	double-stranded RNA binding	10	5.62e-19	DDX58,DDX60,DHX58,EIF2AK2,IFIH1,OAS1,OAS2,OAS3,OASL,TLR3
	GO:0003723	RNA binding	12	3.76e-12	DDX58,DDX60,DHX58,EIF2AK2,IFIH1,IFIT1,ISG20,OAS1,OAS2,OAS3,OASL,TLR3
	GO:0001730	2'-5'-oligoadenylate synthetase activity	3	2.95e-07	OAS1,OAS2,OAS3
	GO:0003676	nucleic acid binding	13	8.56e-07	ADAR,DDX58,DDX60,DHX58,EIF2AK2,IFIH1,IFIT1,ISG20,OAS1,OAS2,OAS3,OASL,TLR3
	GO:0003727	single-stranded RNA binding	4	1.04e-05	DDX58,DDX60,DHX58,IFIH1
	GO:0005829	cytosol	11	0.032	DDX58,DDX60,EIF2AK2,IFIH1,IFIT1,IFIT2,IFIT3,OAS1,OAS2,OAS3,OASL
	hsa05164	Influenza A	8	7.03e-12	ADAR,DDX58,EIF2AK2,IFIH1,OAS1,OAS2,OAS3,TLR3
	hsa05168	Herpes simplex infection	8	7.03e-12	DDX58,EIF2AK2,IFIH1,IFIT1,OAS1,OAS2,OAS3,TLR3
	hsa05160	Hepatitis C	7	4.28e-11	DDX58,EIF2AK2,IFIT1,OAS1,OAS2,OAS3,TLR3
	hsa05162	Measles	7	4.28e-11	ADAR,DDX58,EIF2AK2,IFIH1,OAS1,OAS2,OAS3
	hsa04622	RIG-I-like receptor signaling pathway	3	8.6e-05	DDX58,DHX58,IFIH1
Module 2	GO:0000398	mRNA splicing, via spliceosome	10	1.22e-16	ELAVL2,MAGOHB,NCBP2,PCF11,POLR2F,POLR2H,SNRPA1,SNRPB,SNRPN,U2SURP
	GO:0006353	DNA-templated transcription, termination	5	6.25e-09	NCBP2,PCF11,POLR2F,POLR2H,SNRPB
	GO:0006369	termination of RNA polymerase II transcription	3	1.25e-05	NCBP2,PCF11,SNRPB
	GO:0006370	7-methylguanosine mRNA capping	3	1.25e-05	NCBP2,POLR2F,POLR2H
	GO:0042795	snRNA transcription by RNA polymerase II	3	7.09e-05	NCBP2,POLR2F,POLR2H
	GO:0003723	RNA binding	6	3.14e-05	ELAVL2,NCBP2,PCF11,SNRPA1,SNRPB,SNRPN
	GO:0017069	snRNA binding	3	3.14e-05	NCBP2,SNRPA1,SNRPB
	GO:0030620	U2 snRNA binding	2	6.78e-05	SNRPA1,SNRPB
	GO:0003676	nucleic acid binding	8	0.00018	ELAVL2,NCBP2,PCF11,POLR2F,POLR2H,SNRPA1,SNRPB,SNRPN
	GO:0003729	mRNA binding	3	0.00075	ELAVL2,NCBP2,PCF11
	GO:0005654	nucleoplasm	10	2.18e-06	ELAVL2,MAGOHB,NCBP2,PCF11,POLR2F,POLR2H,SNRPA1,SNRPB,SNRPN,U2SURP
	GO:0005686	U2 snRNP	3	5.21e-06	SNRPA1,SNRPB,SNRPN
	GO:0071013	catalytic step 2 spliceosome	4	5.21e-06	MAGOHB,SNRPA1,SNRPB,SNRPN
	GO:0005684	U2-type spliceosomal complex	3	3.52e-05	SNRPA1,SNRPB,SNRPN
	GO:0005687	U4 snRNP	2	6.9e-05	SNRPB,SNRPN
	hsa03040	Spliceosome	5	3.9e-08	MAGOHB,NCBP2,SNRPA1,SNRPB,U2SURP
	hsa03015	mRNA surveillance pathway	3	6.47e-05	MAGOHB,NCBP2,PCF11
	hsa03020	RNA polymerase	2	0.00045	POLR2F,POLR2H
	hsa04623	Cytosolic DNA-sensing pathway	2	0.0013	POLR2F,POLR2H
	hsa00240	Pyrimidine metabolism	2	0.0026	POLR2F,POLR2H
Module 3	GO:0006364	rRNA processing	4	0.00041	BOP1,DCAF13,DDX47,RPL14
	GO:0006396	RNA processing	6	0.00041	BOP1,DCAF13,DDX47,DQX1,RPL14,RSRC1
	GO:0006412	translation	5	0.00041	EEF1A2,EIF5A2,RPL14,RPL15,RPL39L
	GO:0006518	peptide metabolic process	5	0.00041	EEF1A2,EIF5A2,RPL14,RPL15,RPL39L
	GO:0010467	gene expression	10	0.00041	BOP1,DCAF13,DDX47,DQX1,EEF1A2,EIF5A2,RPL14,RPL15,RPL39L,RSRC1
	GO:0003746	translation elongation factor activity	2	0.00058	EEF1A2,EIF5A2
	GO:0004004	ATP-dependent RNA helicase activity	3	0.00058	DDX47,DDX55,DQX1
	GO:0003735	structural constituent of ribosome	3	0.00083	RPL14,RPL15,RPL39L
	GO:0017111	nucleoside-triphosphatase activity	4	0.0062	DDX47,DDX55,DQX1,EEF1A2
	GO:0003723	RNA binding	4	0.0063	DQX1,EEF1A2,EIF5A2,RPL39L
	GO:1990904	ribonucleoprotein complex	6	0.00026	BOP1,CMSS1,DCAF13,DQX1,RPL15,RPL39L
	GO:0030684	preribosome	3	0.00058	BOP1,CMSS1,DCAF13
	GO:0030686	90S preribosome	2	0.0052	BOP1,CMSS1
	GO:0005730	nucleolus	4	0.0424	BOP1,DCAF13,DDX47,DDX55
	GO:0032991	protein-containing complex	8	0.0446	BOP1,CMSS1,DCAF13,DQX1,EEF1A2,EIF5A2,RPL15,RPL39L
	hsa03010	Ribosome	2	0.0085	RPL14,RPL15
