# Supplementary material for: Development and validation of a RNA binding protein-associated prognostic model for head and neck squamous cell carcinoma
Source: Aging (Albany NY). 2021 Mar 24;13(6):7975–97. doi: 10.18632/aging.202848 (PMC8034976; doi:10.18632/aging.202848)
Supplement: Supplementary Table 4 [file aging-13-202848-s005.xls]

## Sheet: RBP table
Supplementary Table 4. RNA binding proteins list.
gene name
RPS11
ERAL1
DDX27
DEK
PSMA6
TRIM56
TRIM71
UPF2
FARS2
FDXACB1
ALKBH8
ZNF579
POLR2B
WDR12
RPF1
MRPS34
UBTF
CDC5L
DAZAP1
MSI1
MSI2
TARDBP
TRIT1
MRPL36
KPNB1
ZNFX1
SNRNP27
RBMS2
RBMS1
RBMS3
LARS2
KIAA0020
RBFOX1
RBFOX2
RBFOX3
CWF19L1
CWF19L2
ZC3H15
LONP1
DBR1
RRP15
L1TD1
NMD3
SRSF10
SRSF12
SRSF2
SRSF8
RSL1D1
DAP3
NARS2
RBM25
POLR2E
TOE1
TSFM
TPR
STAU1
STAU2
TRMT1L
METTL3
REXO2
MRPL52
WDR3
CNOT11
YTHDC1
METTL2A
METTL2B
ZNF326
AKAP8
AKAP8L
RPS14
ELAVL1
ELAVL2
ELAVL3
ELAVL4
PNN
DDX41
TNPO2
TNPO1
PUSL1
RBM43
ZGPAT
SCAF11
USP39
RPL38
NARS
RPS16
CLASRP
RPS9
TOP3B
NCBP2L
NCBP2
SMG9
FTSJ2
DDX56
RBM28
UTP11L
MRPS18B
RPL14
RPL37
GEMIN5
MKRN1
MKRN2
MKRN3
NOA1
PINX1
HRSP12
TDRD9
DHX30
DHX29
DHX57
YTHDC2
DHX36
DHX9
EIF3G
NOL10
UTP15
GATC
TCOF1
NONO
PSPC1
SFPQ
NUDT21
MRPL19
URM1
MRPL53
RBM48
REPIN1
ZC3H12B
ZC3H12C
ZC3H12D
ZC3H12A
TRMT5
TRMT61A
PABPN1L
PABPN1
LSG1
GNL1
EEF1G
RBM33
RPP25
RPP25L
RPP38
GARS
DRG2
TRMU
GNL2
CPSF2
CD3EAP
HDLBP
RDM1
BYSL
GEMIN8
XPO5
ZNF622
DZIP1
DZIP1L
GSPT1
HBS1L
GSPT2
EIF2D
METTL1
RNASEH1
ZNHIT6
DARS2
SNRPD2
DICER1
DYNLL1
ZNF638
SAMD4B
SAMD4A
RTF1
CNOT4
TARBP2
PRKRA
GLE1
EXOSC2
SSU72
GTPBP10
RPL10A
HENMT1
THOC2
ENDOG
EXOG
ASH1L
TRMT10C
TRMT10A
TRMT10B
MRPL33
SSB
LARP7
MRPL24
RNASEK
PELO
QARS
IPO4
CAPRIN1
CAPRIN2
PNLDC1
PARN
TIAL1
TIA1
CDC40
ZNF598
RCL1
RTCA
MRPL38
ADAT2
BOP1
U2SURP
DUS3L
CSTF3
SRSF11
SREK1
POLR1E
EXOSC7
EXOSC8
EXOSC9
MRPL12
RPS28
TEFM
RPL12
ZC3H3
EIF6
NELFE
EIF2B3
APOBEC2
APOBEC3H
APOBEC3F
APOBEC3G
APOBEC1
ZC3H7A
ZC3H7B
NOP9
PQBP1
PATL2
PATL1
EDC3
WBP4
GLTSCR2
RPS18
ASCC1
EIF5A
EIF5A2
EIF5AL1
MRPL47
BOLL
DAZL
DAZ1
DAZ2
DAZ3
DAZ4
INTS1
RPLP1
MRPS11
WDR43
TRMT112
PPP1R8
FBXO17
MTHFSD
SON
SPATS2L
SPATS2
MAEL
RRP1B
RRP1
ZC3HAV1
PARP12
TIPARP
MRPS17
U2AF2
UHMK1
NUP153
CSDE1
POLR2L
NKRF
MRPL48
XRCC6
SUPT5H
TSR3
XRN2
RSRC1
TDRD5
POLR2J
POLR2J2
POLR2J3
SAFB2
SAFB
SLTM
BRIX1
POLR2I
PWP2
ELAC2
ZCCHC14
ZCCHC2
LARS
MRPL28
CNOT1
DDX18
TSEN15
USP10
SMNDC1
THUMPD2
THUMPD3
SND1
LSM4
EIF3M
MRPL34
SRP72
SUGP1
SUGP2
RPS3
RPS27A
CCAR2
CCAR1
DDX49
MRPL4
SFSWAP
MRPS12
EIF1
EIF1B
CLP1
ZMAT5
SF3B3
PLD6
QTRTD1
QTRT1
PIH1D1
SWT1
EXOSC4
EXOSC6
PTRH1
INTS8
EXOSC10
CASC3
GTF3A
MRPL54
GTPBP3
UBA1
LSM12
HINT3
CCDC59
POLDIP3
RPL32
AZGP1
EMG1
C17orf85
N4BP1
NYNRIN
KHNYN
NOP2
NSUN4
NSUN3
NSUN6
PAN2
ZCCHC9
RRP9
TNRC6A
TNRC6B
TNRC6C
RP9
MRPL15
NGDN
LSM10
PUS1
MAK16
RPS13
SNRNP200
PRDX1
TSN
NUFIP2
RBM19
TDRKH
NOP58
RBM6
RBM10
RBM5
RBM44
OASL
OAS1
OAS2
OAS3
SF3A3
NOC3L
MYEF2
HNRNPM
C11orf68
MRPL10
RNASE10
CALR
CANX
CALR3
RPP14
RPS8
PDCD7
RPS19BP1
TRMT6
RPL4
PRPF3
RARS
RARS2
APOBEC4
ZCCHC24
RPS21
DDX24
RTCB
MBNL2
MBNL3
MBNL1
ALYREF
LSMD1
PUS7
PUS7L
MRPS24
RBBP6
RPL19
NOL3
RPS27
RPS27L
PTRF
MRPS18A
SLBP
EARS2
SMAD1
SMAD2
SMAD5
SMAD9
SMAD3
SMAD4
SMAD7
SMAD6
PRPF39
SRP68
ADARB2
ADAD1
ADAD2
ADAT1
ADARB1
ADAR
CLK3
CLK4
PRPF4B
CLK1
CLK2
LSM3
FAM46A
CRYZ
KIN
RPS2
DUS4L
EIF4A1
EIF4A2
EIF4A3
IGF2BP1
IGF2BP2
IGF2BP3
UBAP2
UBAP2L
SNRPE
EIF2B5
CRNKL1
POLRMT
METTL10
MRPL41
MRPS7
NSUN5
NSUN7
MTG1
MRPS28
TDRD10
RPUSD1
NHP2
XAB2
FAU
RRP36
GRWD1
ENDOV
VARSL
MRRF
MTFMT
C12orf65
MRTO4
RBM26
RBM27
DIS3
DIS3L
DIS3L2
C1QBP
SUB1
MRPS33
PRPF6
SMG8
PSTK
GAPDH
TNPO3
IPO13
MOV10
MOV10L1
PARP1
MRPS35
GPKOW
SETD1A
SETD1B
SF3A2
AFF1
AFF3
AFF4
AFF2
PARK7
TRNAU1AP
SRBD1
EIF3D
NOP10
WARS
MATR3
SNRPD1
SNRPC
FXR1
FXR2
FMR1
MEPCE
KAT8
CIRBP
RBM3
CNOT7
CNOT8
A1CF
RBM46
RBM47
DND1
HNRNPR
SYNCRIP
ABCE1
GPATCH4
PAIP1
RBM20
GNL3
GNL3L
FAM120A
FAM120B
FAM120C
KHDC1
KHDC1L
RPL10L
RPL10
EIF2S1
MRPL20
EPRS
DHX58
DDX58
IFIH1
CDK5RAP1
HABP4
SERBP1
METTL5
ZCCHC7
WDR36
CCDC86
C2orf15
MRPL30
RPS26
TEX13A
BARD1
XPO4
RUVBL1
IMP4
DDX52
THOC1
TRPT1
NHP2L1
EIF2B2
RNF113B
RNF113A
INTS10
LENG9
RPS29
NOP16
U2AF1
U2AF1L4
RANBP6
IPO5
THOC7
DNMT3B
GFM1
RNASE9
PLRG1
REXO1
ZC3HAV1L
LSM14A
LSM14B
LUZP4
TDRD6
TDRD15
MRPS22
EEF1B2
EEF1D
SIDT1
SIDT2
TRMT44
GPATCH8
WDR4
SLIRP
ATXN1
ATXN1L
YTHDF1
YTHDF2
YTHDF3
LRPPRC
TFIP11
ILF2
STRBP
ILF3
TCERG1
NXF5
NXF2B
NXF2
NXF1
NXF3
ZRSR1
ZRSR2
MRPL35
RRS1
PRKDC
NOC2L
MTIF3
NOL11
EXOSC3
PNPT1
TSNAX
RIOK1
RIOK3
PIWIL1
PIWIL2
PIWIL3
PIWIL4
PEG10
ZCCHC5
POP7
FASTKD3
TBRG4
FASTK
TRMT13
IREB2
ACO1
ZCCHC3
SNUPN
PTRHD1
HARS
HARS2
HNRNPK
PCBP1
PCBP2
PCBP3
PCBP4
AQR
ICT1
UNK
UNKL
CEBPZ
MRPS9
THG1L
ZCCHC13
CNBP
SRRT
CD2BP2
SNRPG
APTX
RPL17
BMS1
SARS
SARS2
PAIP2
PAIP2B
GEMIN4
PNRC2
FASTKD2
GEMIN6
DDX20
DDX39A
DDX39B
DHX37
ZNF346
MRPL50
RNASE1
RNASE2
RNASE3
RNASE4
RNASE6
RNASE7
RNASE8
ANG
DYNC1H1
FTSJ3
SF3B2
CTU2
XPOT
RBMXL1
RBMXL2
RBMXL3
RBMY1A1
RBMY1B
RBMY1D
RBMY1E
RBMY1F
RBMY1J
RBMX
PPP1R10
PRR3
DKC1
MRPL17
TRA2A
TRA2B
RPL26L1
RPL26
AUH
EIF3C
EIF3CL
SCAF8
SCAF4
EEF2K
RPL6
MRPL11
G3BP1
G3BP2
MRPS26
SF3B5
DHX34
UTP23
SNRNP48
PRPF38B
HEXIM1
HEXIM2
SRRM2
SRRM3
PIH1D3
DHX40
DHX38
TRMT61B
CSDC2
CARHSP1
POP4
LARP6
RNPC3
RPL30
RUVBL2
DRG1
TRIM25
RQCD1
MRPS18C
MRPL45
RPLP2
SRP19
RPS24
AKAP17A
NXT2
NXT1
MRPL9
RPL27
RPL24
CNOT10
ABT1
DDX25
DDX19A
DDX19B
MRPS30
SMG1
EXOSC5
AIMP2
BZW2
BZW1
PARS2
INTS12
EIF3H
SKIV2L
RC3H2
RC3H1
ZFP36
ZFP36L1
ZFP36L2
ANKHD1
ANKRD17
HELZ2
UPF1
DROSHA
MRPL37
PUS10
NUDT16
NUDT16L1
TRMT11
PET112
NUFIP1
PURA
PURB
PURG
ZRANB2
THOC5
TSEN54
SRP9
PIN4
ZC3H14
CNOT2
TARBP1
AGO1
AGO2
AGO3
AGO4
LARP4B
LARP4
SNW1
EZH2
EIF3B
RPP30
ZMAT3
PTGES3
KARS
RAN
SNRPA
SNRPB2
HEATR1
PTGES3L-AARSD1
AARSD1
CPSF3
CPSF3L
CWC25
RPS5
POLR2D
C9orf114
MRPL44
ETF1
GAR1
MVP
RPF2
ZC3H18
INTS5
INTS3
LSM6
SNRPF
TUT1
MTPAP
EIF2AK1
EIF2AK2
EIF2AK3
EIF2AK4
MRPL22
PES1
LSM7
PAPD4
ZCCHC11
ZCCHC6
KHDRBS1
KHDRBS2
KHDRBS3
QKI
SF1
LRRC47
ISY1
SRRM1
IPO9
MTRF1
MTRF1L
WIBG
PPAN
FUBP3
FUBP1
KHSRP
CHTOP
PTCD2
POLR2A
MRPL43
DDX55
RPS15
CPSF4
CPSF4L
CSTF2
CSTF2T
RAVER2
RAVER1
EIF1AX
EIF1AY
DALRD3
NSUN2
URB2
PHAX
PPARGC1A
PPARGC1B
PPRC1
PHF5A
MCTS1
RRP7A
DGCR8
ZC3H13
UPF3A
UPF3B
RBM24
RBM38
THOC3
IGHMBP2
PAPD5
PAPD7
GFM2
PHRF1
VARS
VARS2
MRPL1
INTS7
ATXN2L
ATXN2
PPIL4
PPIL3
PPWD1
CWC27
PPIH
NUTF2
MRPL18
LSM11
AARS2
AARS
MIF4GD
CTIF
C9orf129
LUC7L2
LUC7L3
LUC7L
DUS2
RNF17
TDRD1
MRPS10
FAM103A1
ENOX1
ENOX2
RBPMS
RBPMS2
NIP7
RPL3
RPL3L
RNASE11
RNASE12
RPLP0
RBM34
CMTR2
ENDOU
PUM1
PUM2
TYW5
TYW3
TRMT1
RAE1
SLU7
EIF2B4
EIF5B
GPATCH1
RPL36
EEF1A1
EEF1A2
RRP8
UBA52
R3HDM1
R3HDM2
PA2G4
AAR2
ERI1
ERI2
ERI3
NIFK
METTL14
MRPL32
CPSF6
CPSF7
RPL7A
WDR46
SRP14
TFAM
CMSS1
XPO6
EXOSC1
ZNF106
UTP14A
UTP14C
TRUB1
TRUB2
PRIM1
PTCD3
HNRNPA0
HNRNPA1
HNRNPA1L2
HNRNPA2B1
HNRNPA3
HNRNPAB
HNRNPD
HNRNPDL
RANBP2
RPL7
RPL7L1
RNASE13
RPS6
MRPL3
DDX28
DDX47
RNASEH2C
TFB2M
TEP1
NOC4L
CPSF1
DDX1
DDX3X
DDX3Y
DDX4
NOP56
RPS20
MPHOSPH10
MRM1
DXO
DENR
RPL21
RPS10
NAT10
UTP18
NOL12
DDX31
ABCF1
DNMT1
SNRPA1
API5
SHQ1
AKAP1
FTO
PUF60
SAMHD1
RBM45
FAM98B
FAM98A
FAM98C
PCF11
EIF5
ZC3HC1
HNRNPC
HNRNPCL1
RALY
RALYL
SEPSECS
NPM1
NPM3
NPM2
NUPL2
MRPS14
SF3A1
EIF3A
FASTKD5
TDRD3
SNRPB
SNRPN
YRDC
POLR2K
ERN2
ERN1
RPL5
RPS17
RPS17L
DARS
IPO7
IPO8
SMN1
SMN2
GTPBP4
MRPL13
MRPL46
LSM5
EIF4G3
EIF4G1
EIF4G2
GTF2F1
RPS15A
PIH1D2
TTF2
PUS3
RBM7
RBM11
TSEN2
RBM42
UTP3
HNRNPL
HNRNPLL
PTBP1
PTBP2
PTBP3
SYMPK
POLR2F
TSR2
KIAA0391
POLR2G
WDR5
SNRNP40
WDR83
ZFC3H1
RPL15
SNRNP35
SNRNP70
MRPL39
TLR7
TLR8
TLR3
NAA38
PRPF31
MRPL55
TRMT2A
TRMT2B
RPS3A
BRCA1
RIOK2
DHX16
DHX33
DHX35
DHX32
DQX1
DHX15
DHX8
MRPS5
SAP18
TUFM
EEFSEC
TDRD12
SKIV2L2
TRDMT1
ZNF473
FCF1
URB1
CARS
CARS2
CELF1
CELF2
CELF3
CELF4
CELF5
CELF6
XPO1
DDX17
DDX46
DDX5
DDX42
DDX43
DDX53
FIP1L1
MRPL14
TXNL4A
TXNL4B
RBM39
RBM23
CPEB1
CPEB2
CPEB3
CPEB4
INTS9
CACTIN
MPHOSPH6
RPL34
OBFC1
RPS12
PRPF8
SECISBP2L
SECISBP2
RPUSD3
RPUSD4
DDX6
RPL28
ELAC1
NOM1
TROVE2
EEF1E1
TARSL2
TARS
TARS2
IARS
RPL18A
ESF1
EEF2
EFTUD2
DDX60
DDX60L
MRPL2
SLC4A1AP
MAZ
EIF2S3L
EIF2S3
AIMP1
APEX1
EIF3J
PABPC3
PABPC1L
PABPC1L2A
PABPC1L2B
PABPC4L
PABPC5
PABPC4
PABPC1
MEX3A
MEX3B
MEX3C
MEX3D
GEMIN7
MRPS23
PSIP1
SRP54
FARSB
SPEN
RBM15B
RBM15
DNAAF2
SF3B1
RNASEH2B
FARSA
NOB1
EIF2A
RNASEL
TRNT1
EIF4ENIF1
MECP2
RBM22
CMTR1
RPL39
RPL39L
RPSA
PARP4
CSTF1
NCBP1
SNRNP25
DNAJC21
CWC22
NFX1
MRPS31
SMG5
SART1
GEMIN2
NR0B1
DCP2
TAF15
EWSR1
FUS
EDC4
FBLL1
FBL
MRPS27
ALKBH1
ZCCHC17
MRPL49
RPL18
RPS4X
RPS4Y1
RPS4Y2
NOP14
KRR1
NCL
PRPF18
C1D
ADAT3
UTP20
SNIP1
GUF1
GCFC2
UTP6
SRSF1
SRSF3
SRSF4
SRSF5
SRSF6
SRSF7
SRSF9
USB1
NOL6
PPIE
RRBP1
SUZ12
TERT
MSL3
BICC1
MRPS16
RBMX2
MRPL40
ISG20
ISG20L2
AEN
REXO4
TGS1
ZC3H4
ZC3H6
ZC3H8
RPL27A
RPS19
SYF2
TFB1M
DIMT1
TSEN34
DCAF13
RPL9
ARHGEF28
AC004381.6
EIF4H
EIF4B
DDX54
MRPS36
PRPF40A
PRPF40B
EIF3L
NOL8
MTO1
PSMA1
HTATSF1
FTSJ1
LAS1L
POP1
DZIP3
DGCR14
CDK9
PAN3
RPL29
DCPS
MRP63
MRPL27
POLR2H
ZNF239
XRN1
ZFR
ZFR2
AGFG1
NSA2
DDX10
TBL3
INTS2
YBX1
YBX2
YBX3
SURF6
THOC6
EIF3I
STRAP
RPL13
RRP12
MRPS2
ZCCHC8
EFTUD1
RPL35
NSRP1
RPUSD2
BCDIN3D
THUMPD1
TRIM21
RANBP17
XPO7
TRMT12
ACIN1
ZNF385A
RPL23
EED
DNTTIP2
SBDS
DDX51
RBM18
IPO11
RPL22
RPL22L1
LCMT2
ZC3H11A
FYTTD1
RNPS1
RPS23
RNASEH2A
FRG1B
FRG1
NOL7
PRPF38A
RBM41
RBM12
RBM12B
ESRP1
ESRP2
HNRNPF
HNRNPH1
HNRNPH2
HNRNPH3
GRSF1
RNH1
NOL9
SRFBP1
ARL6IP4
RPP40
ALKBH5
SMG7
PDE12
CCRN4L
ANGEL1
ANGEL2
CNOT6
CNOT6L
PDCD11
RPL35A
MRPL21
SMG6
PRPF19
PRPF4
INTS4
SRPK2
SUPV3L1
RBM17
NAF1
YARS
LRRFIP1
LRRFIP2
EIF4E2
EIF4E1B
EIF4E3
EIF4E
BUD13
CTU1
GTPBP1
GTPBP2
MTERFD2
SRPR
DDX50
DDX21
ZCRB1
RPL13A
SRA1
PAPOLB
PAPOLG
PAPOLA
RPL41
ZNF768
SCAF1
MRPS15
RNASET2
EIF2B1
RPL36A
RPL36AL
DDX26B
INTS6
RPS7
RRNAD1
MRPS21
SETD7
RBM8A
MAGOH
MAGOHB
RPL37A
NOLC1
IARS2
LSM1
SUPT4H1
EXO1
DCP1B
DCP1A
DNAJC17
RNGTT
DUSP11
CHERP
WDR61
NANOS1
NANOS2
NANOS3
EBNA1BP2
HELZ
RNMTL1
PDCD4
PTRH2
SART3
ZC3H10
LSM2
MRPS25
RPP21
ZMAT2
IFIT1
IFIT2
IFIT5
IFIT1B
IFIT3
NOVA1
NOVA2
SNRPD3
YARS2
PTCD1
TSR1
MRPS6
TAF9
RPL11
DDX23
DDX59
CCNT2
CCNT1
RPL8
SARNP
IMP3
SRRM4
CNP
LIN28A
LIN28B
EIF3K
SF3B14
EIF2S2
RNMT
MRPL42
THRAP3
BCLAF1
CXorf23
PNO1
RBM4
RBM4B
RBM14
R3HCC1
R3HCC1L
KIAA0430
POP5
MRPL51
MARS
TYW1
MRPL16
DUS1L
QRSL1
WARS2
WRAP53
RSL24D1
SF3B4
TDRD7
LARP1
LARP1B
RPL23A
BAZ2A
BAZ2B
EIF3E
CWC15
TOP1
RPL31
SUPT6H
TST
HNRNPU
HNRNPUL1
HNRNPUL2
RPS25
MRPL23
EIF1AD
SETX
MARS2
CNOT3
MTIF2
JAKMIP1
FASTKD1
